# Supplementary material for: Detection and Yield of Colorectal Cancer Surveillance in Adults with PTEN Hamartoma Tumour Syndrome
Source: MDPI journal article supplement (doi:10.3390/cancers14164005), 2022-08-19
Supplement: s1 [file s1]

Supplementary Materials

# Detection and Yield of Colorectal Cancer Surveillance in Adults with *PTEN* Hamartoma Tumour Syndrome

Meggie M. C. M. Drissen, Janet R. Vos, Dorien T. J. van der Biessen-van Beek, Rachel S. van der Post, Iris D. Nagtegaal, Mariëtte C. A. van Kouwen, Tanya M. Bisseling and Nicoline Hoogerbrugge

**Table S1.** Detection and yield of colorectal cancer surveillance in adult PHTS patients, stratified for gender.

|                                         | FEMALES                      |                      | MALES                        |                      |
|-----------------------------------------|------------------------------|----------------------|------------------------------|----------------------|
|                                         | Patients (N=24) <sup>3</sup> | Colonoscopies (N=42) | Patients (N=13) <sup>3</sup> | Colonoscopies (N=19) |
| <b>Colorectal carcinomas</b>            |                              |                      |                              |                      |
| Presence, N (%)                         | 0 (0%)                       | 0 (0%)               | 0 (0%)                       | 0 (0%)               |
| Detection rate (95% CI) <sup>1</sup>    |                              | 0 (0-10)             |                              | 0 (0-21)             |
| <b>Adenomas</b>                         |                              |                      |                              |                      |
| Presence, N (%)                         | 9 (38%)                      | 10 (24%)             | 4 (31%)                      | 4 (21%)              |
| Detection rate (95% CI) <sup>1</sup>    |                              | 24 (13-40)           |                              | 21 (7-46)            |
| Age at first detection, median (IQR)    | 51 (43-58)                   |                      | 57 (49-63)                   |                      |
| Location, N (%)                         | n.a.                         |                      | n.a.                         |                      |
| Proximal                                |                              | 7 (70%)              |                              | 5 (100%)             |
| Distal                                  |                              | 2 (20%)              |                              | 0 (0%)               |
| Both proximal and distal                |                              | 1 (10%)              |                              | 0 (0%)               |
| Advanced adenoma, N (%) <sup>2</sup>    |                              | 0 (0%)               |                              | 1 (25%)              |
| Number of adenomas, median (IQR)        |                              | 1 (1-2)              |                              | 1 (1-1)              |
| Time to detection (years), median (IQR) |                              | 3 (3-5)              |                              | 3                    |
| <b>Hamartomas</b>                       |                              |                      |                              |                      |
| <b>Hamartomas of no special type</b>    |                              |                      |                              |                      |
| Presence, N (%)                         | 8 (33%)                      | 8 (19%)              | 8 (62%)                      | 10 (53%)             |
| Detection rate (95% CI) <sup>1</sup>    |                              | 19 (9-35)            |                              | 53 (29-75)           |
| Age at first detection, median (IQR)    | 51 (44-54)                   |                      | 55 (46-62)                   |                      |
| Location, N (%)                         | n.a.                         |                      | n.a.                         |                      |
| Proximal                                |                              | 2 (25%)              |                              | 0 (0%)               |
| Distal                                  |                              | 3 (38%)              |                              | 3 (33%)              |
| Both proximal and distal                |                              | 3 (38%)              |                              | 6 (67%)              |
| <b>Ganglioneuromas</b>                  |                              |                      |                              |                      |
| Presence, N (%)                         | 9 (38%)                      | 12 (29%)             | 6 (46%)                      | 8 (42%)              |
| Detection rate (95% CI) <sup>1</sup>    |                              | 29 (16-45)           |                              | 42 (21-66)           |
| Age at first detection, median (IQR)    | 41 (40-47)                   |                      | 48 (45-57)                   |                      |
| Location, N (%)                         | n.a.                         |                      | n.a.                         |                      |
| Proximal                                |                              | 7 (58%)              |                              | 3 (38%)              |
| Distal                                  |                              | 3 (25%)              |                              | 3 (38%)              |
| Both proximal and distal                |                              | 2 (17%)              |                              | 2 (25%)              |
| <b>Juvenile polyps</b>                  |                              |                      |                              |                      |
| Presence, N (%)                         | 1 (4%)                       | 1 (2%)               | 0 (0%)                       | 0 (0%)               |
| Detection rate (95% CI) <sup>1</sup>    |                              | 2 (0-14)             |                              | 0 (0-21)             |
| Age at first detection                  | 40                           |                      | n.a.                         |                      |
| Location, N (%)                         | n.a.                         |                      | n.a.                         |                      |
| Proximal                                |                              | 0 (0%)               |                              | n.a.                 |
| Distal                                  |                              | 1 (100%)             |                              | n.a.                 |
| Both proximal and distal                |                              | 0 (0%)               |                              | n.a.                 |
| <b>Lymphoid polyps</b>                  |                              |                      |                              |                      |
| Presence, N (%)                         | 1 (4%)                       | 1 (2%)               | 2 (15%)                      | 2 (11%)              |
| Detection rate (95% CI) <sup>1</sup>    |                              | 2 (0-14)             |                              | 11 (2-35)            |
| Age at first detection, median (IQR)    | 47                           |                      | 46 (44-47)                   |                      |
| Location, N (%)                         | n.a.                         |                      | n.a.                         |                      |
| Proximal                                |                              | 1 (100%)             |                              | 0 (0%)               |
| Distal                                  |                              | 0 (0%)               |                              | 1 (50%)              |

|                                      |            |           |            |           |
|--------------------------------------|------------|-----------|------------|-----------|
| Both proximal and distal             |            | 0 (0%)    |            | 1 (50%)   |
| <b>Inflammatory polyps</b>           |            |           |            |           |
| Presence, N (%)                      | 5 (21%)    | 5 (12%)   | 2 (15%)    | 2 (11%)   |
| Detection rate (95% CI) <sup>1</sup> |            | 12 (4-26) |            | 11 (2-35) |
| Age at first detection, median (IQR) | 45 (42-58) |           | 42 (41-42) |           |
| Location, N (%)                      | n.a.       |           | n.a.       |           |
| Proximal                             |            | 4 (80%)   |            | 0 (0%)    |
| Distal                               |            | 0 (0%)    |            | 2 (100%)  |
| Both proximal and distal             |            | 1 (20%)   |            | 0 (0%)    |
| <b>Hyperplastic polyps</b>           |            |           |            |           |
| Presence, N (%)                      | 6 (25%)    | 7 (17%)   | 1 (8%)     | 1 (5%)    |
| Detection rate (95% CI) <sup>1</sup> |            | 17 (8-32) |            | 5 (0-28)  |
| Age at first detection, median (IQR) | 47 (42-54) |           | 49         |           |
| Location, N (%)                      | n.a.       |           | n.a.       |           |
| Proximal                             |            | 2 (29%)   |            | 0 (0%)    |
| Distal                               |            | 5 (71%)   |            | 1 (100%)  |
| Both proximal and distal             |            | 0 (0%)    |            | 0 (0%)    |
| <b>Sessile serrated lesions</b>      |            |           |            |           |
| Presence, N (%)                      | 4 (17%)    | 5 (12%)   | 3 (23%)    | 3 (16%)   |
| Detection rate (95% CI) <sup>1</sup> |            | 12 (4-26) |            | 16 (4-40) |
| Age at first detection, median (IQR) | 47 (45-54) |           | 44 (42-46) |           |
| Location, N (%)                      | n.a.       |           | n.a.       |           |
| Proximal                             |            | 4 (80%)   |            | 2 (67%)   |
| Distal                               |            | 1 (20%)   |            | 0 (0%)    |
| Both proximal and distal             |            | 0 (0%)    |            | 1 (33%)   |

Abbreviations: PHTS: *PTEN* Hamartoma Tumour Syndrome; CI: confidence interval; IQR: inter-quartile range; n.a.: not assessed. <sup>1</sup> Detection rates represent the number of colonoscopies during which at least one lesion was detected per 100 colonoscopies. <sup>2</sup> Adenomas with at least one of the following features: a  $\geq 10$  mm size, a villous or tubulovillous histology, or high-grade dysplasia. <sup>3</sup> For patients with multiple colonoscopies, lesions were considered present if detected during at least one colonoscopy.
